# Supplementary material for: Novel Clustering Methods Identified Three Caries Status-Related Clusters Based on Oral Microbiome in Thai Mother–Child Dyads
Source: MDPI journal article supplement (doi:10.3390/genes14030641), 2023-03-03
Supplement: s1 [file s1]

## Supplementary Materials

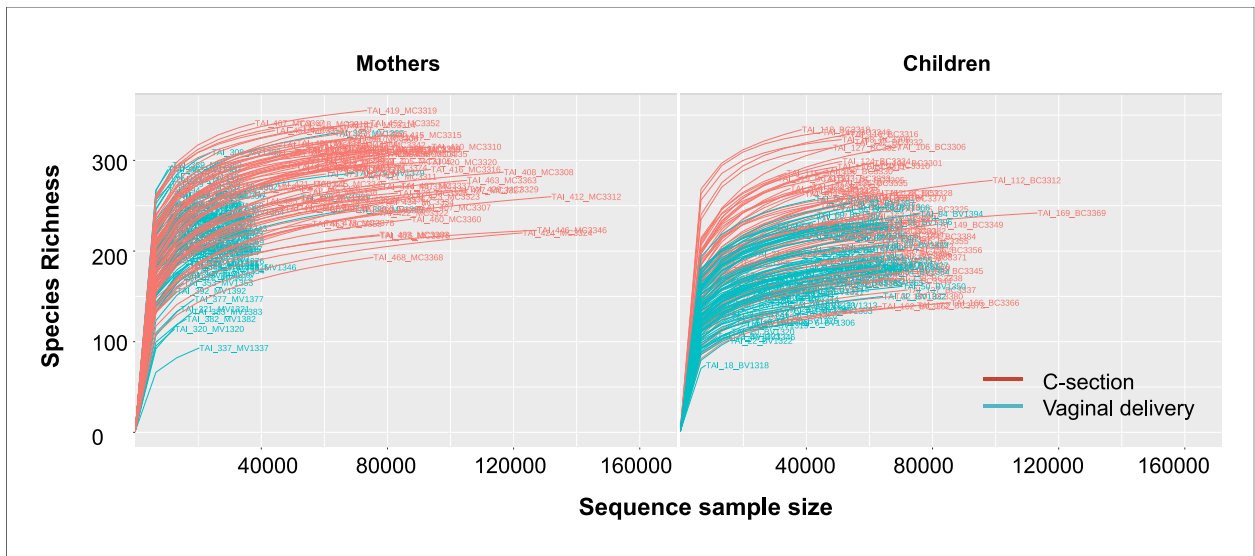

**Figure S1.** Rarefaction curve of mother and children's salivary oral microbiome.
